# Supplementary material
Source: Springer Nature journal article supplement (https://www.springermedizin.de/resource/supplementary/12873_2012_166_MOESM1_ESM.pdf/9431606)
Supplement: MOESM1 [file 9431606]

Consultation for data variables:  
December 2008  
Consultation with IT experts for  
software and application design

Multiple Soft-ware  
iterations  
March-August 2009

Pretest Phase  
August-October 2009

Changes in software,  
based on pretest  
November Dec 2009

Project Approval,  
budgeting, training of  
research assistant

Pilot Testing of  
KITR: November  
2010-Jan 2011
